# Supplementary material for: A3B-type miktoarm star polymer nanoassemblies prepared by reversible addition–fragmentation chain transfer (RAFT) dispersion polymerization
Source: Royal Society of Chemistry journal article supplement (doi:10.1039/d2py00935h), 2022-01-01
Supplement: d2py00935h1.pdf [file d2py00935h1.pdf]

**Electronic Supplementary Material (ESI) for Polymer Chemistry.**  
**This journal is © The Royal Society of Chemistry 2022**

---

## **ELECTRONIC SUPPLEMENTARY INFORMATION**

# **A<sub>3</sub>B-type miktoarm star polymer nanoassemblies prepared by reversible addition-fragmentation chain transfer (RAFT) dispersion polymerization**

*Xinru Zhang,<sup>a</sup> Zhiqiang Wei,<sup>a</sup> Kai Liu,<sup>a</sup> Li Wang,<sup>\*a</sup> and Wantai Yang<sup>\*abc</sup>*

*<sup>a</sup> State Key Laboratory of Chemical Resource Engineering, Beijing University of Chemical Technology, Beijing 100029, China*

*<sup>b</sup> Beijing Engineering Research Center for the Syntheses and Applications of Waterborne Polymers, College of Materials Science and Engineering, Beijing University of Chemical Technology, Beijing 100029, China*

*<sup>c</sup> Beijing Advanced Innovation Centre for Soft Matter Science and Engineering, Beijing 100029, China*

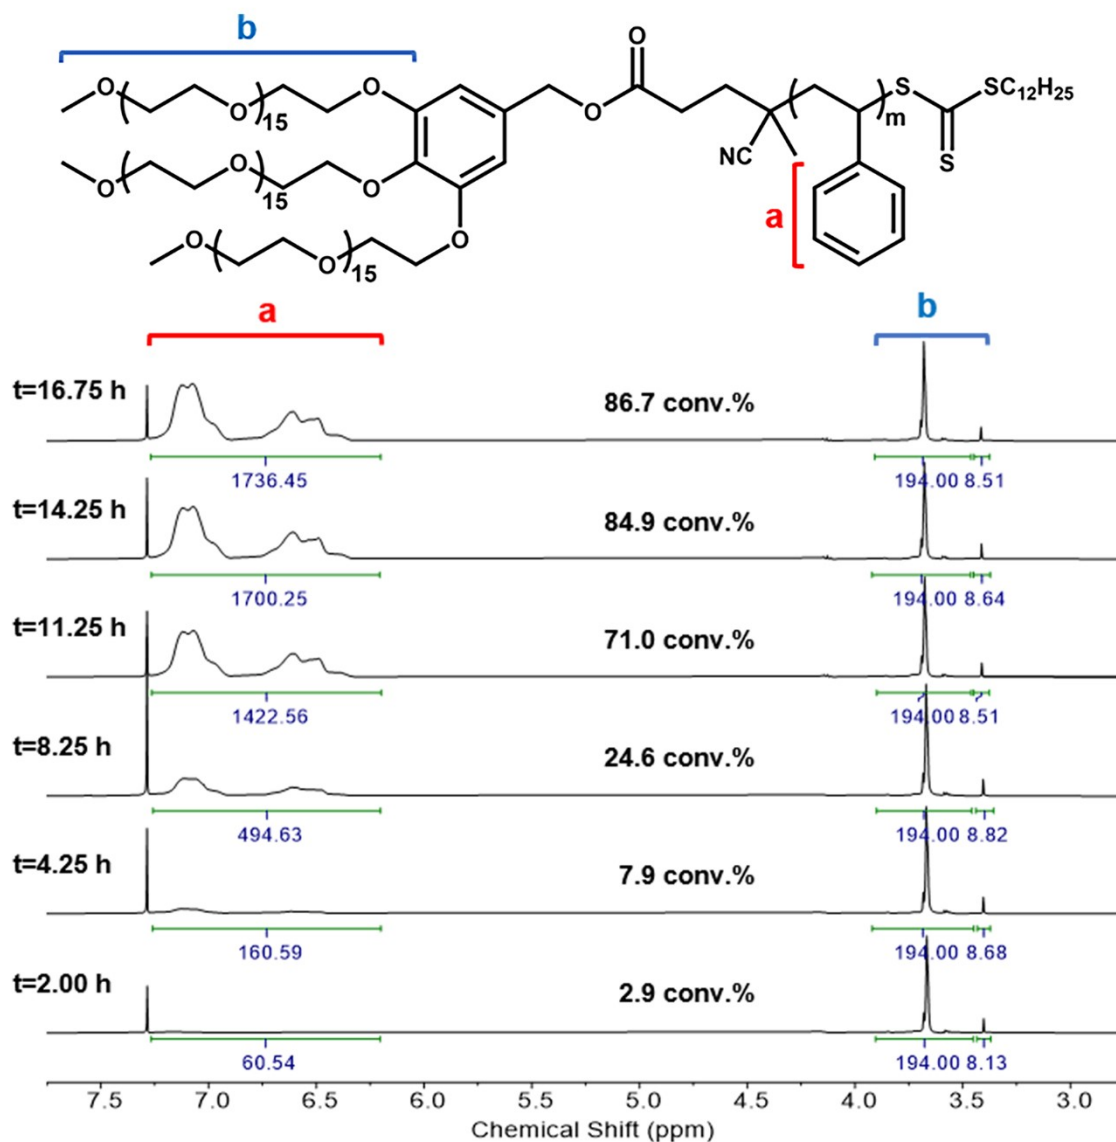

**Figure S1**  $^1\text{H}$  NMR spectra for the kinetic study of (mPEG750)<sub>3</sub>-CDPA mediated RAFT dispersion polymerization of St ( $\text{CDCl}_3$ ).  $[\text{CTA}]/[\text{AIBN}] = 3/1$ ,  $\text{MeOH}/\text{H}_2\text{O} = 4/1$  (w/w),  $70^\circ\text{C}$ , 48 h.

$$\text{Conversion}\% = \frac{(S_a - 2)/5}{DP_{\text{design}}}$$

**Equation S1** Calculation of conversion by  $^1\text{H}$  NMR.

$$M_{n,\text{NMR}} = M_{\text{styrene}} \times \frac{S_a - 2}{5} + M_{\text{CTA}}$$

**Equation S2** Calculation of  $M_{n,\text{NMR}}$  by  $^1\text{H}$  NMR.

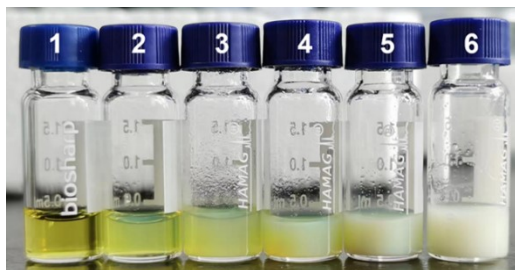

**Figure S2** Digital images of the withdrawn samples from the RAFT dispersion polymerization of St mediated by (mPEG750)<sub>3</sub>-CDPA. Polymerization conditions: [St]<sub>0</sub>: [CTA]: [AIBN] = 1200:3:1, 15 wt% solids, MeOH/H<sub>2</sub>O = 4/1 (w/w), 70 °C. 1-6 correspond to 4.25, 8.25, 11.25, 14.25, 16.75, and 19.75 h.

**Table S1** Polymerization results of RAFT-PISA mediated by (mPEG750)<sub>3</sub>-CDPA and mPEG2000-CDPA at 25% solids

| macro-CTA                        | [M] <sub>0</sub> : [CTA] <sub>0</sub> :<br>[I] <sub>0</sub> <sup>a</sup> | Conv% <sup>b</sup> | M <sub>n</sub> (g/mol)          |                                 | Đ <sup>e</sup> | Morphology |
|----------------------------------|--------------------------------------------------------------------------|--------------------|---------------------------------|---------------------------------|----------------|------------|
|                                  |                                                                          |                    | M <sub>n,GPC</sub> <sup>c</sup> | M <sub>n,NMR</sub> <sup>d</sup> |                |            |
| (mPEG750) <sub>3</sub> -<br>CDPA | 180:3:1                                                                  | 66.6               | 8100                            | 6900                            | 1.18           | —          |
|                                  | 225:3:1                                                                  | 85.3               | 9700                            | 9400                            | 1.18           | S          |
|                                  | 270:3:1                                                                  | 80.5               | 11200                           | 10200                           | 1.06           | S, W       |
|                                  | 300:3:1                                                                  | 92.4               | 15800                           | 12300                           | 1.08           | W, V       |
|                                  | 420:3:1                                                                  | 87.7               | 17500                           | 15500                           | 1.11           | V          |
|                                  | 480:3:1                                                                  | 99.0               | 20700                           | 19300                           | 1.10           | V          |
|                                  | 660:3:1                                                                  | 99.0               | 25800                           | 25700                           | 1.12           | V          |
|                                  | 840:3:1                                                                  | 98.5               | 32300                           | 31400                           | 1.15           | V          |
|                                  | 1020:3:1                                                                 | 97.9               | 35000                           | 37300                           | 1.15           | V          |
| 1200:3:1                         | 70.8                                                                     | 31300              | 32200                           | 1.14                            | V              |            |
| mPEG2000-<br>CDPA                | 180:3:1                                                                  | 66.6               | 8600                            | 6600                            | 1.12           | —          |
|                                  | 225:3:1                                                                  | 80.4               | 9600                            | 8700                            | 1.13           | S, W       |
|                                  | 270:3:1                                                                  | 89.0               | 12200                           | 10700                           | 1.17           | S, V       |
|                                  | 300:3:1                                                                  | 99.0               | 16100                           | 12800                           | 1.16           | V          |
|                                  | 480:3:1                                                                  | 96.9               | 19700                           | 19000                           | 1.18           | V          |
|                                  | 660:3:1                                                                  | 91.8               | 24600                           | 24200                           | 1.15           | V          |
|                                  | 840:3:1                                                                  | 88.2               | 29300                           | 26800                           | 1.25           | V          |
|                                  | 1020:3:1                                                                 | 92.4               | 36300                           | 34100                           | 1.14           | V          |
|                                  | 1200:3:1                                                                 | 57.7               | 22100                           | 26400                           | 1.18           | V          |

<sup>a</sup>molar ratio of reactant; <sup>b</sup>conversion calculated by <sup>1</sup>H NMR; <sup>c</sup>number average molecular weight by GPC; <sup>d</sup>number average molecular weight calculated by <sup>1</sup>H NMR; <sup>e</sup>polydispersity index by GPC. (“—” means no assembly occurred, “W” means worms-like micelle, “S” means sphere-like micelle, “V” means vesicle, “OV” means oversized-vesicle, “CV” means columnar vesicle, “MLV” means multi-lamellar vesicle.

Scheme S1 DP<sub>PS</sub> range of the worm-like micelle of (mPEG750)<sub>3</sub>-PS and mPEG2000-*b*-PS at 25% solids.

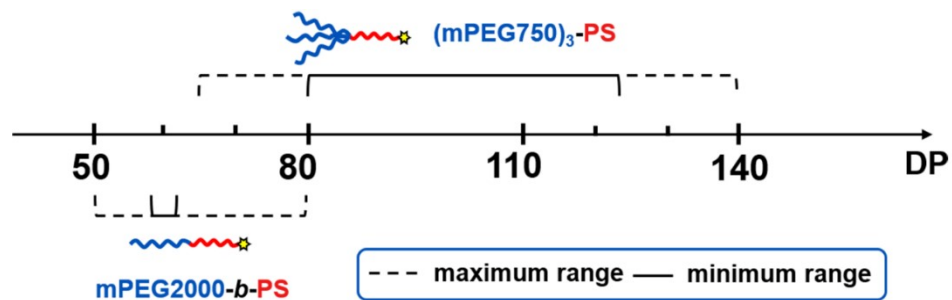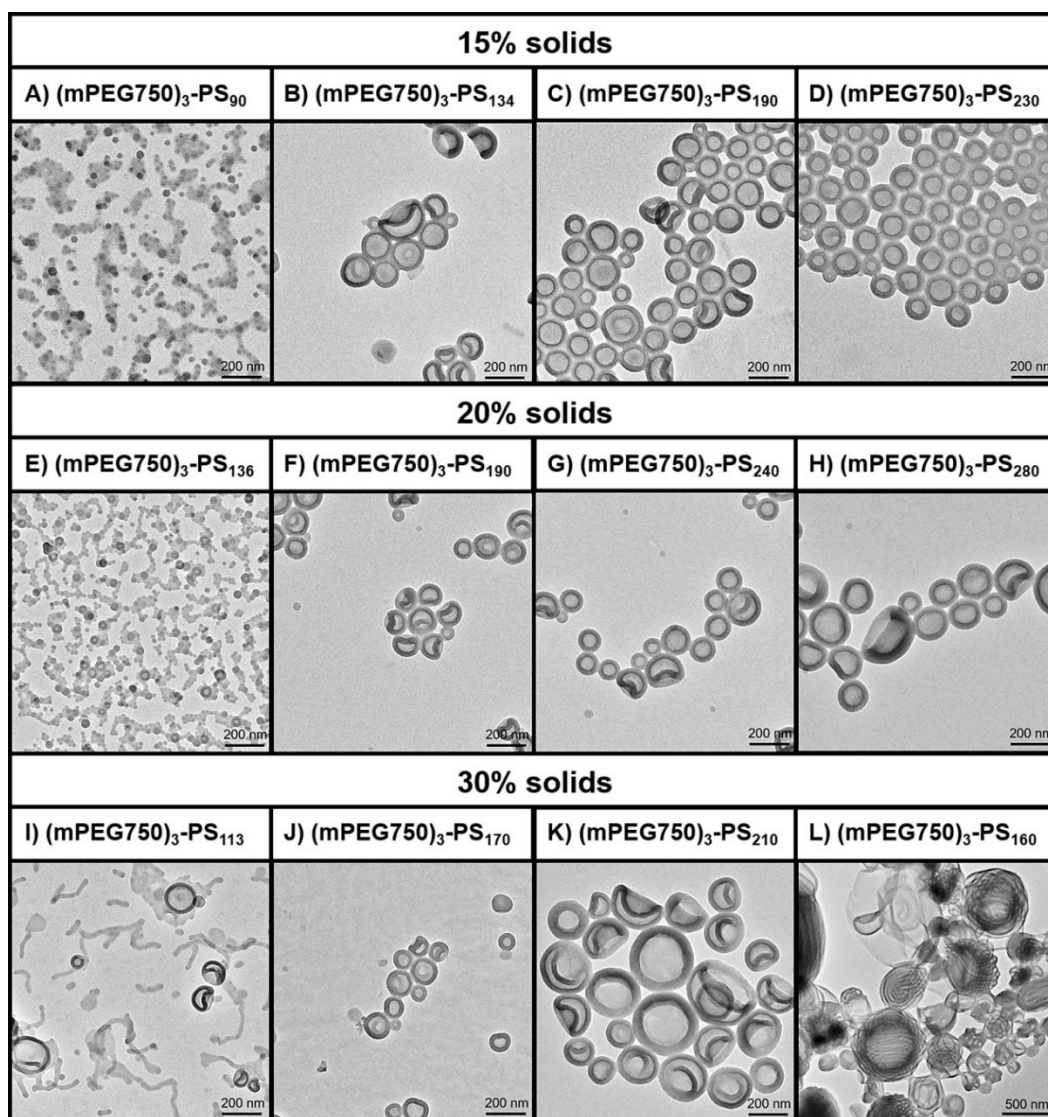

Figure S3 The TEM micrographs of (mPEG750)<sub>3</sub>-PS at 15, 20, and 30 wt% solids.

[CTA]/[AIBN] = 3/1, MeOH/H<sub>2</sub>O = 4/1 (w/w), 70 °C, 48 h.

**Electronic Supplementary Material (ESI) for Polymer Chemistry.**

**This journal is © The Royal Society of Chemistry 2022**

**Table S2** Polymerization results of (mPEG550)<sub>3</sub>-CDPA mediated RAFT polymerization of St at 10-30% solids

| Solid content | [M] <sub>0</sub> : [CTA] <sub>0</sub> : [I] <sub>0</sub> <sup>a</sup> | Conv% <sup>b</sup> | M <sub>n</sub> (g/mol)           |                                  | Đ <sup>e</sup> | Morphology |
|---------------|-----------------------------------------------------------------------|--------------------|----------------------------------|----------------------------------|----------------|------------|
|               |                                                                       |                    | M <sub>n, GPC</sub> <sup>c</sup> | M <sub>n, NMR</sub> <sup>d</sup> |                |            |
| 10%           | 150:3:1                                                               | 74.4               | 6500                             | 6000                             | 1.10           | —          |
|               | 210:3:1                                                               | 71.4               | 8100                             | 7300                             | 1.13           | V          |
|               | 270:3:1                                                               | 73.3               | 9500                             | 9000                             | 1.12           | V          |
|               | 360:3:1                                                               | 50.8               | 12000                            | 8500                             | 1.04           | V          |
|               | 480:3:1                                                               | 66.3               | 15100                            | 13200                            | 1.05           | V          |
|               | 600:3:1                                                               | 71.5               | 17000                            | 17000                            | 1.05           | V          |
|               | 720:3:1                                                               | 80.8               | 22700                            | 22300                            | 1.07           | V          |
|               | 840:3:1                                                               | 65.3               | 22700                            | 21200                            | 1.05           | V          |
|               | 1080:3:1                                                              | 41.2               | 23400                            | 22300                            | 1.10           | V          |
| 15%           | 1320:3:1                                                              | 66.3               | 31100                            | 29800                            | 1.10           | V          |
|               | 120:3:1                                                               | 70.5               | 5100                             | 5100                             | 1.11           | —          |
|               | 240:3:1                                                               | 69.8               | 9800                             | 8000                             | 1.05           | —          |
|               | 360:3:1                                                               | 75.8               | 13300                            | 11600                            | 1.07           | V          |
|               | 480:3:1                                                               | 74.1               | 15900                            | 14500                            | 1.06           | V          |
|               | 600:3:1                                                               | 82.1               | 19900                            | 19200                            | 1.10           | V          |
|               | 720:3:1                                                               | 75.7               | 22400                            | 21100                            | 1.14           | OV         |
|               | 840:3:1                                                               | 67.4               | 24600                            | 21800                            | 1.11           | OV         |
|               | 960:3:1                                                               | 25.2               | 13600                            | 10600                            | 1.11           | —          |
| 20%           | 1080:3:1                                                              | 29.0               | 15500                            | 13000                            | 1.08           | —          |
|               | 180:3:1                                                               | 72.0               | 7400                             | 6700                             | 1.06           | —          |
|               | 240:3:1                                                               | 71.0               | 8900                             | 8100                             | 1.07           | —          |
|               | 360:3:1                                                               | 75.7               | 12000                            | 11600                            | 1.10           | V          |
|               | 480:3:1                                                               | 83.2               | 15300                            | 16000                            | 1.10           | V          |
|               | 600:3:1                                                               | 67.5               | 15100                            | 16200                            | 1.16           | V          |
| 25%           | 720:3:1                                                               | 28.7               | 10300                            | 9300                             | 1.16           | —          |
|               | 180:3:1                                                               | 36.3               | 8000                             | 4400                             | 1.06           | —          |
|               | 240:3:1                                                               | 54.5               | 9500                             | 6700                             | 1.06           | —          |
|               | 360:3:1                                                               | 66.3               | 13000                            | 10500                            | 1.10           | V          |
|               | 480:3:1                                                               | 74.0               | 16200                            | 14500                            | 1.12           | V          |
|               | 600:3:1                                                               | 29.3               | 10300                            | 8300                             | 1.08           | —          |
| 30%           | 720:3:1                                                               | 26.0               | 10300                            | 8700                             | 1.07           | —          |
|               | 180:3:1                                                               | 74.7               | 8500                             | 6800                             | 1.06           | —          |
|               | 300:3:1                                                               | 77.8               | 11800                            | 10300                            | 1.10           | —          |
|               | 420:3:1                                                               | 83.0               | 14500                            | 14300                            | 1.11           | V, CV, MLV |
|               | 600:3:1                                                               | 40.5               | 12100                            | 10600                            | 1.08           | —          |

<sup>a</sup>molar ratio of reactant; <sup>b</sup>conversion calculated by <sup>1</sup>H NMR; <sup>c</sup>number average molecular weight by GPC; <sup>d</sup>number average molecular weight calculated by <sup>1</sup>H NMR; <sup>e</sup>polydispersity index by GPC. (“—” means no assembly occurred, “V” means vesicle, “OV” means oversized-vesicle, “CV” means columnar vesicle, “MLV” means multi-lamellar vesicle.)

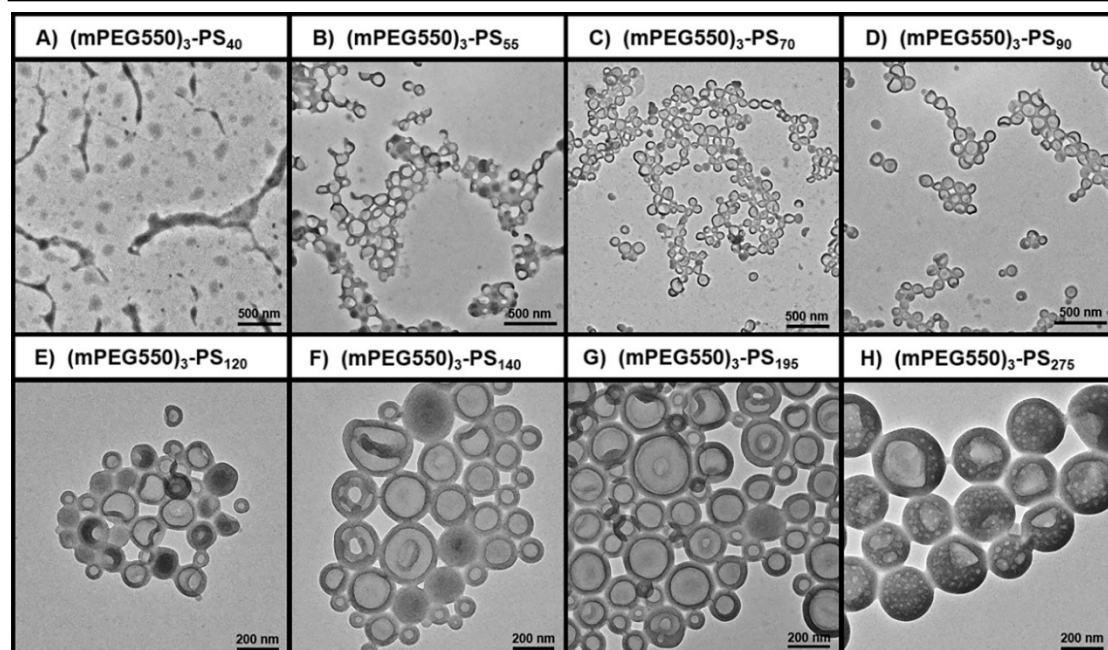

**Figure S4** TEM micrographs of (mPEG550)<sub>3</sub>-PS at 10% solids. [CTA]/[AIBN] = 3/1, MeOH/H<sub>2</sub>O = 4/1 (w/w), 70 °C, 48 h.

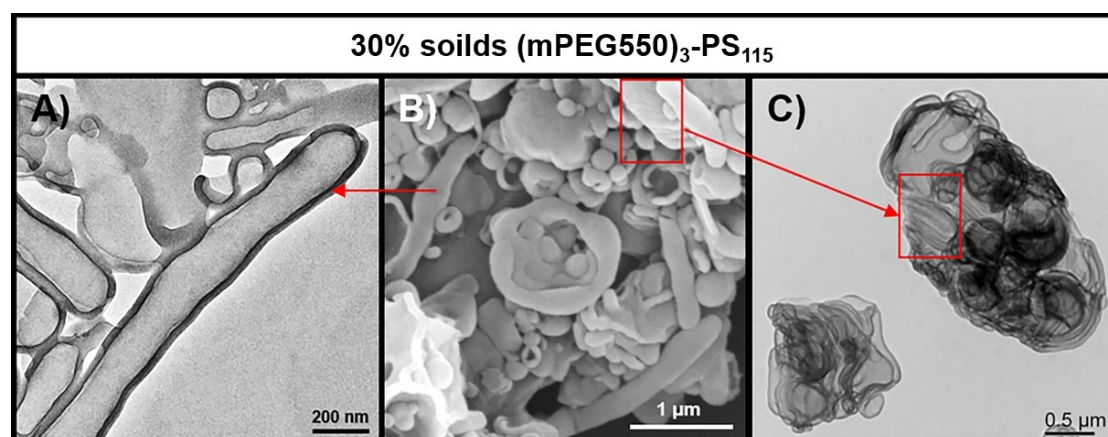

**Figure S5** TEM (A, C) and SEM (B) micrographs of (mPEG550)<sub>3</sub>-PS<sub>115</sub>. [CTA]/[AIBN] = 3/1, MeOH/H<sub>2</sub>O = 4/1 (w/w), 70 °C, 48 h.

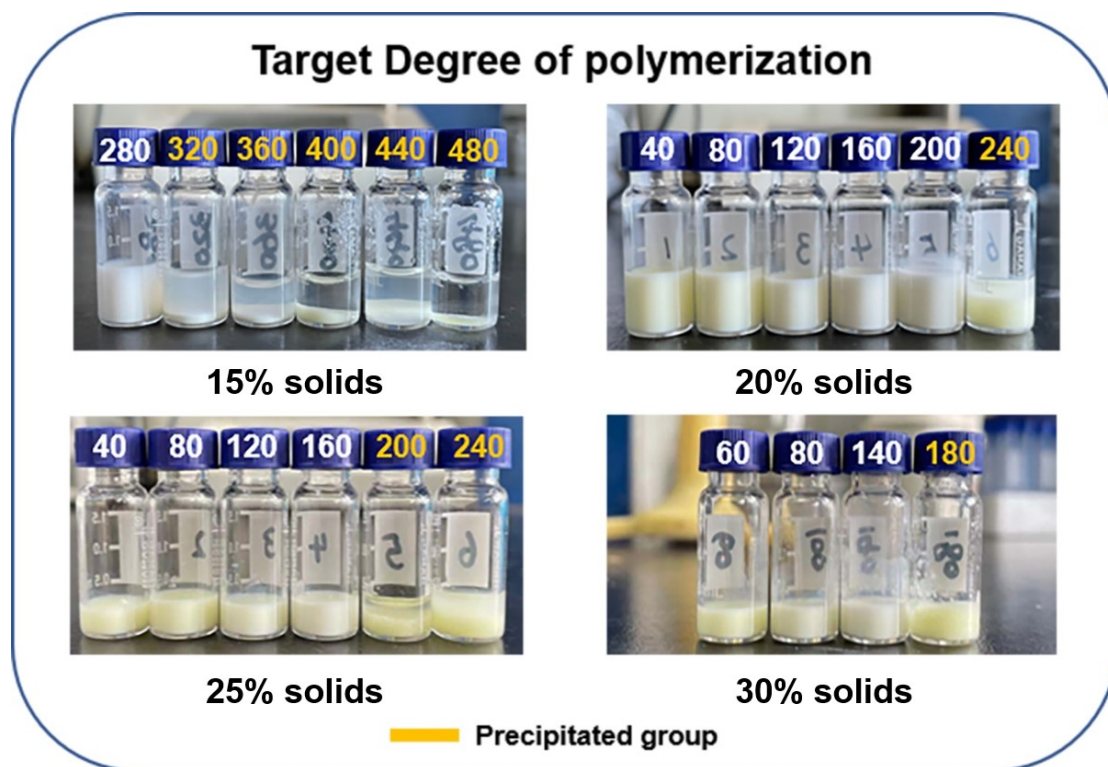

**Figure S6** Digital images of the polymerization system of (mPEG550)<sub>3</sub>-PS at different solids. [CTA]/[AIBN] = 3/1, MeOH/H<sub>2</sub>O = 4/1 (w/w), 70 °C, 48 h.

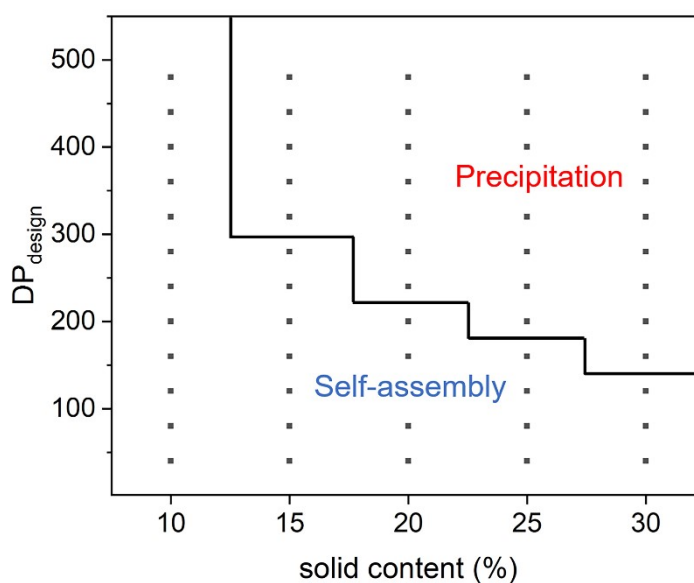

**Figure S7** Phase diagram of the self-assembly and precipitation of (mPEG550)<sub>3</sub>-CDPA mediated RAFT dispersion polymerization of St.

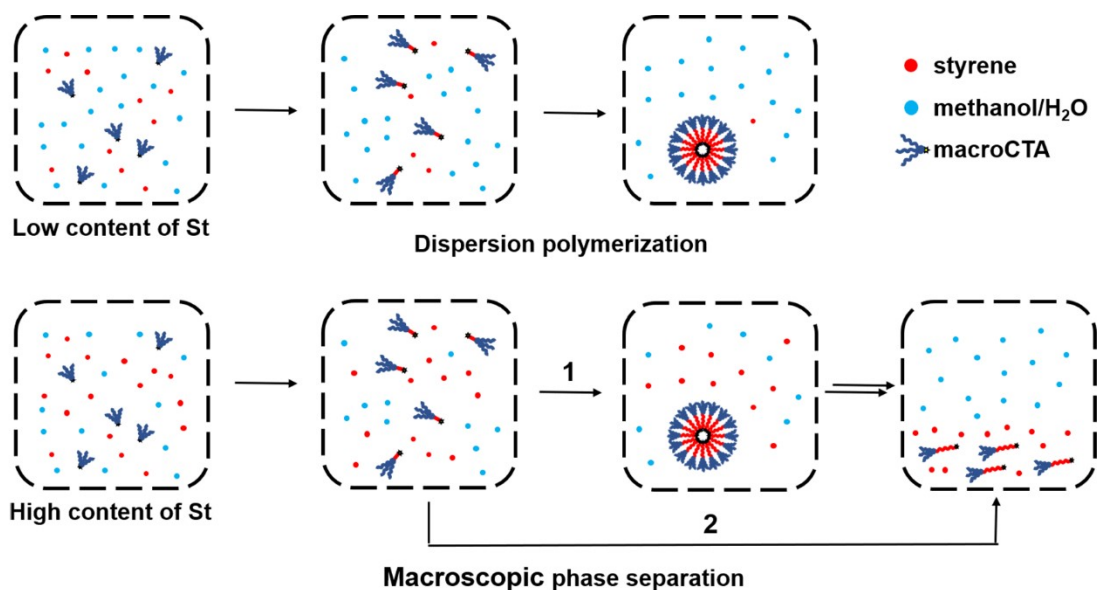

**Figure S8** Possible process of dispersion polymerization and macroscopic phase separation in (mPEG550)<sub>3</sub>-CDPA mediated RAFT polymerization of St. Process 1 occurs at relatively low solids and targeted DP<sub>PS</sub>, while process 2 occurs at relatively high solids and targeted DP<sub>PS</sub>.



**Electronic Supplementary Material (ESI) for Polymer Chemistry.****This journal is © The Royal Society of Chemistry 2022****Table S3** Polymerization results of (mPEG1000)<sub>3</sub>-CDPA mediated RAFT polymerization of St at 15-25% solids

| Solid content | [M] <sub>0</sub> : [CTA] <sub>0</sub> : [I] <sub>0</sub> <sup>a</sup> | Conv% <sup>b</sup> | M <sub>n</sub> (g/mol)          |                                 | Đ <sup>e</sup> | Morphology |
|---------------|-----------------------------------------------------------------------|--------------------|---------------------------------|---------------------------------|----------------|------------|
|               |                                                                       |                    | M <sub>n,GPC</sub> <sup>c</sup> | M <sub>n,NMR</sub> <sup>d</sup> |                |            |
| 15%           | 600:3:1                                                               | 80.6               | 24900                           | 20300                           | 1.26           | S          |
|               | 900:3:1                                                               | 78.9               | 34100                           | 28100                           | 1.29           | S          |
|               | 1200:3:1                                                              | 71.6               | 50800                           | 33300                           | 1.20           | S          |
|               | 1500:3:1                                                              | 78.9               | 51800                           | 44500                           | 1.19           | S          |
|               | 1800:3:1                                                              | 81.9               | 58800                           | 54600                           | 1.23           | S          |
|               | 2100:3:1                                                              | 81.7               | 65800                           | 63000                           | 1.25           | S          |
|               | 2400:3:1                                                              | 77.1               | 60600                           | 67600                           | 1.29           | S          |
| 20%           | 600:3:1                                                               | 69.0               | 20800                           | 17800                           | 1.08           | S          |
|               | 900:3:1                                                               | 69.1               | 28000                           | 25000                           | 1.11           | S          |
|               | 1200:3:1                                                              | 62.2               | 38900                           | 29400                           | 1.09           | S          |
|               | 1500:3:1                                                              | 68.3               | 45100                           | 39000                           | 1.13           | S, V       |
|               | 1800:3:1                                                              | 62.8               | 48200                           | 42700                           | 1.15           | S, V       |
|               | 2100:3:1                                                              | 60.9               | 54400                           | 47900                           | 1.16           | S, V       |
|               | 2400:3:1                                                              | 63.1               | 57900                           | 56000                           | 1.20           | S, V       |
| 25%           | 600:3:1                                                               | 77.7               | 22000                           | 19700                           | 1.08           | S          |
|               | 900:3:1                                                               | 75.9               | 28900                           | 27200                           | 1.10           | S, V       |
|               | 1200:3:1                                                              | 79.5               | 39000                           | 36600                           | 1.14           | V          |
|               | 1500:3:1                                                              | 70.7               | 41900                           | 40200                           | 1.13           | V          |
|               | 1800:3:1                                                              | 68.6               | 47700                           | 46300                           | 1.14           | V          |
|               | 2100:3:1                                                              | 71.2               | 54200                           | 55300                           | 1.18           | V          |
|               | 2400:3:1                                                              | 59.8               | 53700                           | 53200                           | 1.17           | V          |

<sup>a</sup>molar ratio of reactant; <sup>b</sup>conversion calculated by <sup>1</sup>H NMR; <sup>c</sup>number average molecular weight by GPC; <sup>d</sup>number average molecular weight calculated by <sup>1</sup>H NMR; <sup>e</sup>polydispersity index by GPC (“S” means sphere-like micelle, “V” means vesicle).

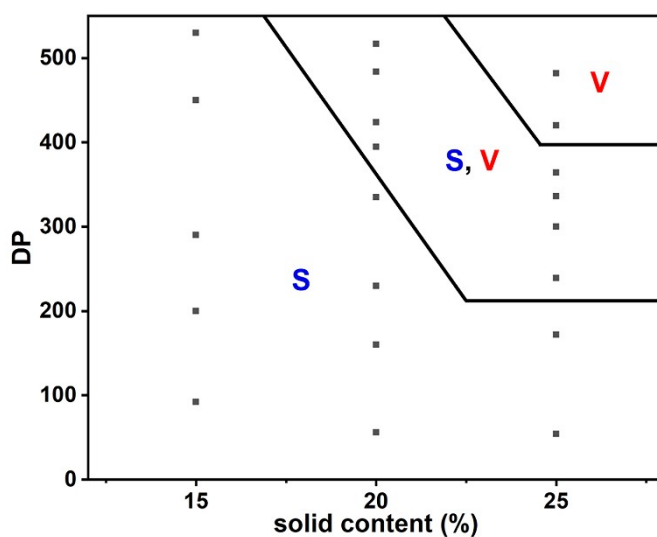

Figure S9 Phase diagram of (mPEG1000)<sub>3</sub>-PS at different solids and DP<sub>PS</sub>.

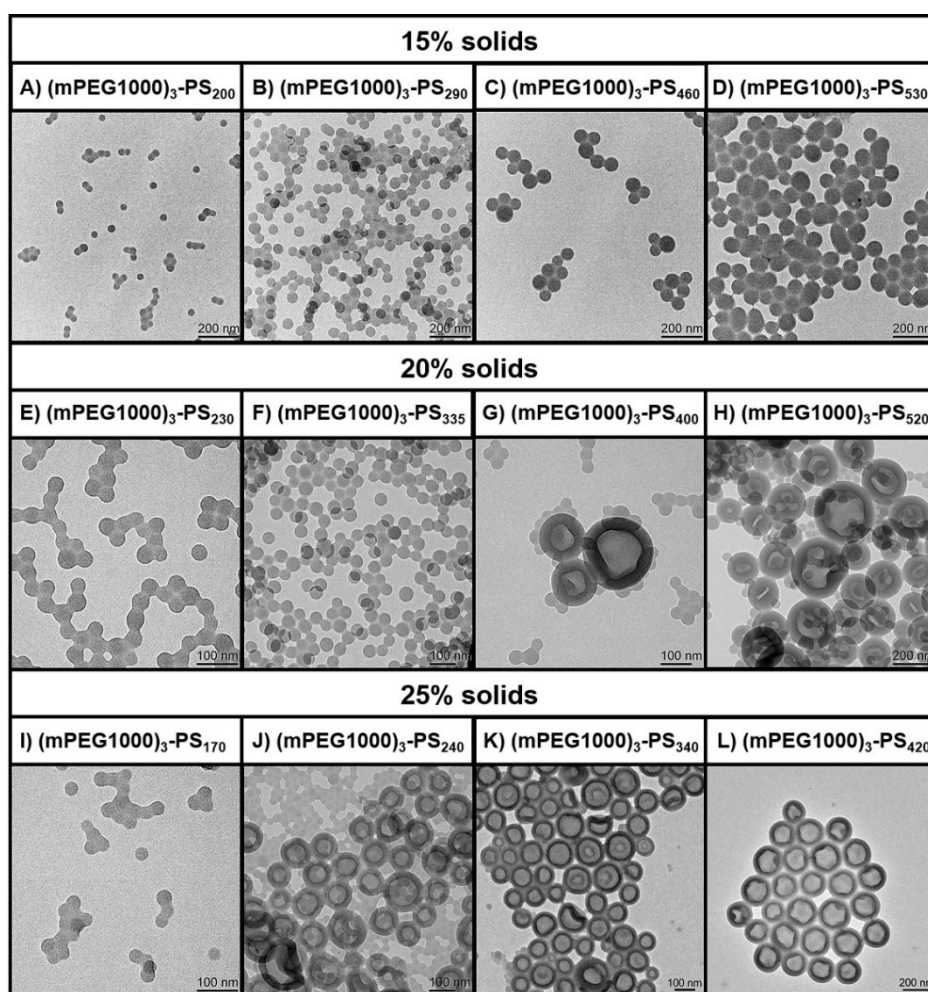

Figure S10 TEM micrographs of (mPEG1000)<sub>3</sub>-PS at 15%-25% solids. [CTA]/[AIBN] = 3/1, MeOH/H<sub>2</sub>O = 4/1 (w/w), 70 °C, 48 h.

**Electronic Supplementary Material (ESI) for Polymer Chemistry.**

**This journal is © The Royal Society of Chemistry 2022**

**Table S4** Polymerization results of (mPEG2000)<sub>3</sub>-CDPA mediated RAFT polymerization of St at 20% and 30% solids

| Solid content | [M] <sub>0</sub> : [CTA] <sub>0</sub> : [I] <sub>0</sub> <sup>a</sup> | Conv% <sup>b</sup> | M <sub>n</sub> (g/mol)          |                                 | Đ <sup>e</sup> | Morphology |
|---------------|-----------------------------------------------------------------------|--------------------|---------------------------------|---------------------------------|----------------|------------|
|               |                                                                       |                    | M <sub>n,GPC</sub> <sup>c</sup> | M <sub>n,NMR</sub> <sup>d</sup> |                |            |
| 20%           | 900:3:1                                                               | 85                 | 32900                           | 33100                           | 1.22           | S          |
|               | 1500:3:1                                                              | 93.4               | 58300                           | 55100                           | 1.14           | S          |
|               | 2100:3:1                                                              | 93.9               | 75200                           | 74900                           | 1.18           | S          |
|               | 2700:3:1                                                              | 91.0               | 92000                           | 91600                           | 1.20           | S          |
|               | 3300:3:1                                                              | 82.1               | 95300                           | 100400                          | 1.21           | S          |
|               | 3900:3:1                                                              | 94.6               | 112200                          | 134500                          | 1.29           | S          |
| 30%           | 900:3:1                                                               | 99.7               | 38300                           | 37700                           | 1.10           | S          |
|               | 1500:3:1                                                              | 97.0               | 57200                           | 57000                           | 1.13           | S          |
|               | 2100:3:1                                                              | 99.1               | 75000                           | 78700                           | 1.16           | S          |
|               | 2700:3:1                                                              | 98.0               | 93400                           | 98300                           | 1.20           | S          |
|               | 3300:3:1                                                              | 93.8               | 101000                          | 113900                          | 1.19           | S          |
|               | 3900:3:1                                                              | 96.1               | 115400                          | 136400                          | 1.20           | S          |

<sup>a</sup>molar ratio of reactant; <sup>b</sup>conversion calculated by <sup>1</sup>H NMR; <sup>c</sup>number average molecular weight by GPC; <sup>d</sup>number average molecular weight calculated by <sup>1</sup>H NMR; <sup>e</sup>polydispersity index by GPC. ("S" means sphere-like micelle)

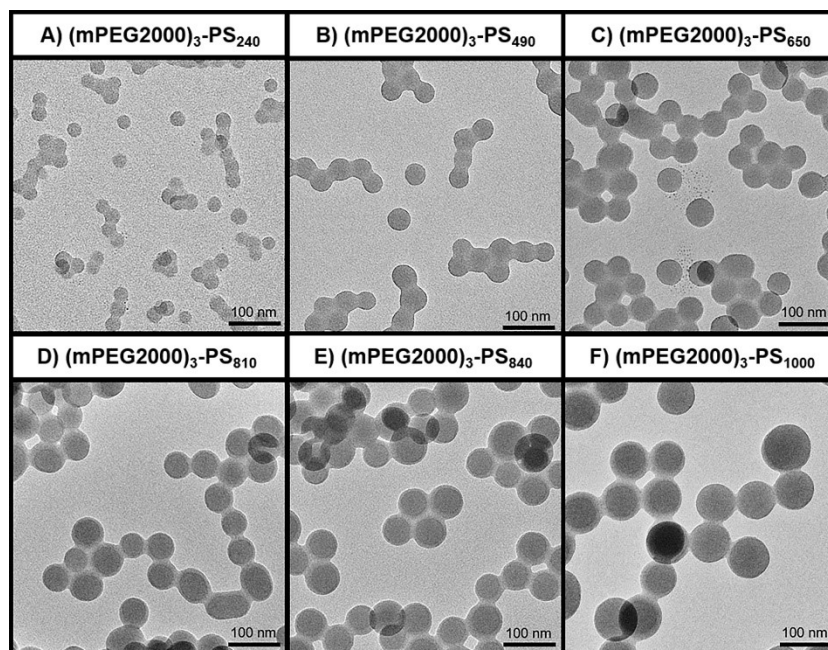

**Figure S11** TEM micrographs of (mPEG2000)<sub>3</sub>-PS at 20% solids. [CTA]/[AIBN] = 3/1, MeOH/H<sub>2</sub>O = 4/1 (w/w), 70 °C, 48 h.

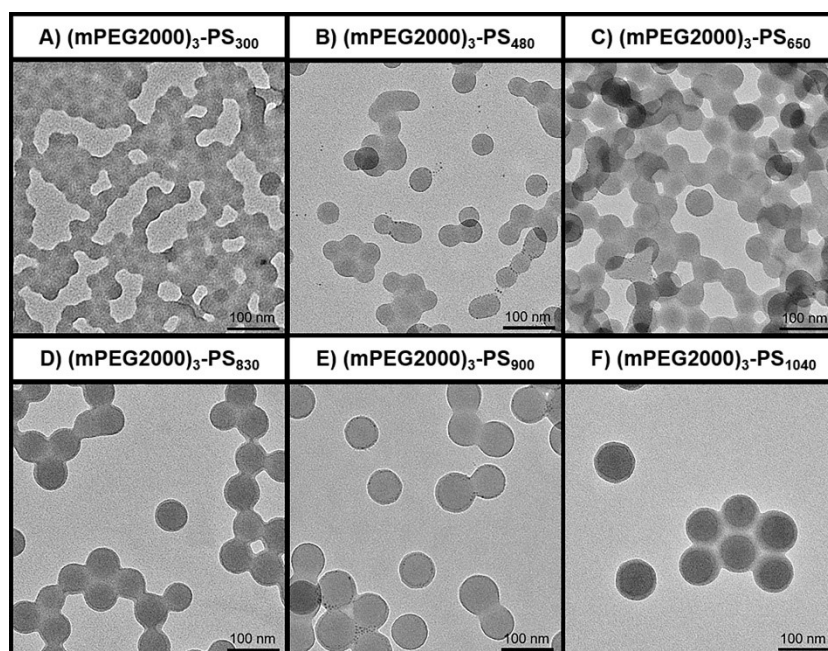

**Figure S12** TEM micrographs of (mPEG2000)<sub>3</sub>-PS at 30% solids. [CTA]/[AIBN] = 3/1, MeOH/H<sub>2</sub>O = 4/1 (w/w), 70 °C, 48 h.
